# Supplementary material for: High performance Ge nanowire anode sheathed with carbon for lithium rechargeable batteries
Source: Royal Society of Chemistry journal article supplement (doi:10.1039/c0ee00552e), 2010-11-29
Supplement: c0ee00552e.pdf [file c0ee00552e.pdf]

## Supporting information

### **High performance Ge Nanowire Anode sheathed with Carbon for Lithium Rechargeable Batteries**

Min-Ho Seo<sup>a</sup>, Mihee Park<sup>a</sup>, Kyu Tae Lee<sup>a</sup>, Kitae Kim<sup>b</sup>, Jeyoung Kim<sup>b</sup>, Jaephil Cho<sup>a\*</sup>

*<sup>a</sup>Interdisciplinary School of Green Energy,*

*Ulsan National Institute of Science and Technology (UNIST, Ulsan 689-798, Korea*

*<sup>b</sup>Battery R&D, LG Chem, Ltd. 104-1, Moonji-dong, Yuseong-gu, Daejeon, Korea 305-380*

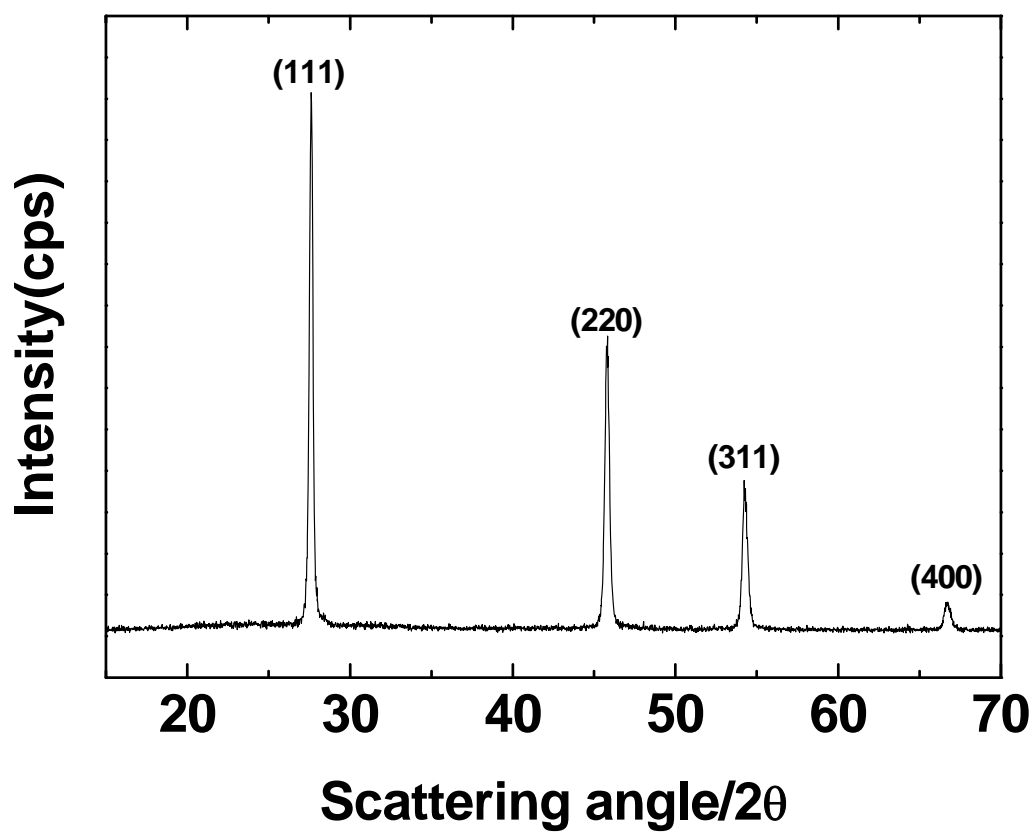

S1. XRD pattern of Ge NW sheathed with carbon.

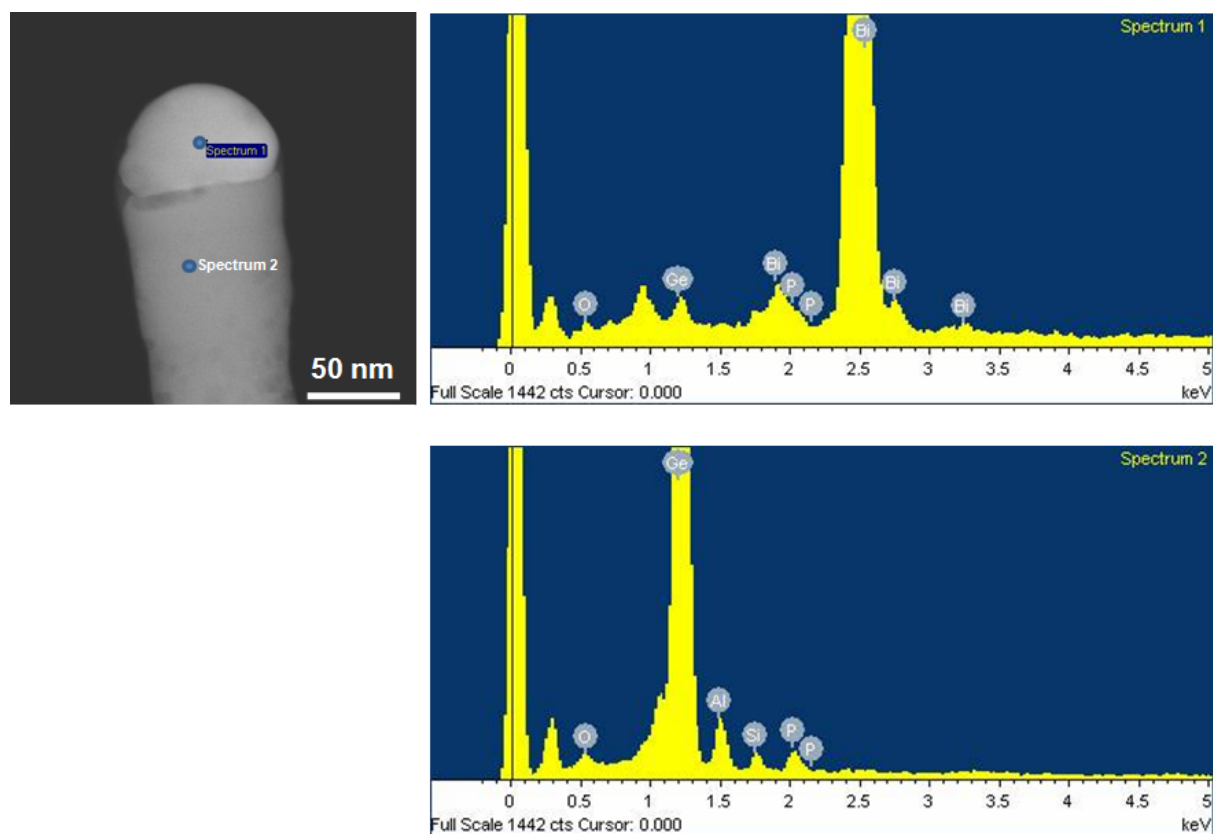

**S2.** TEM image of Ge-NW (left) and Energy dispersive X-ray spectroscopy of GE-NW at spectrum 1 and spectrum 2 (right).

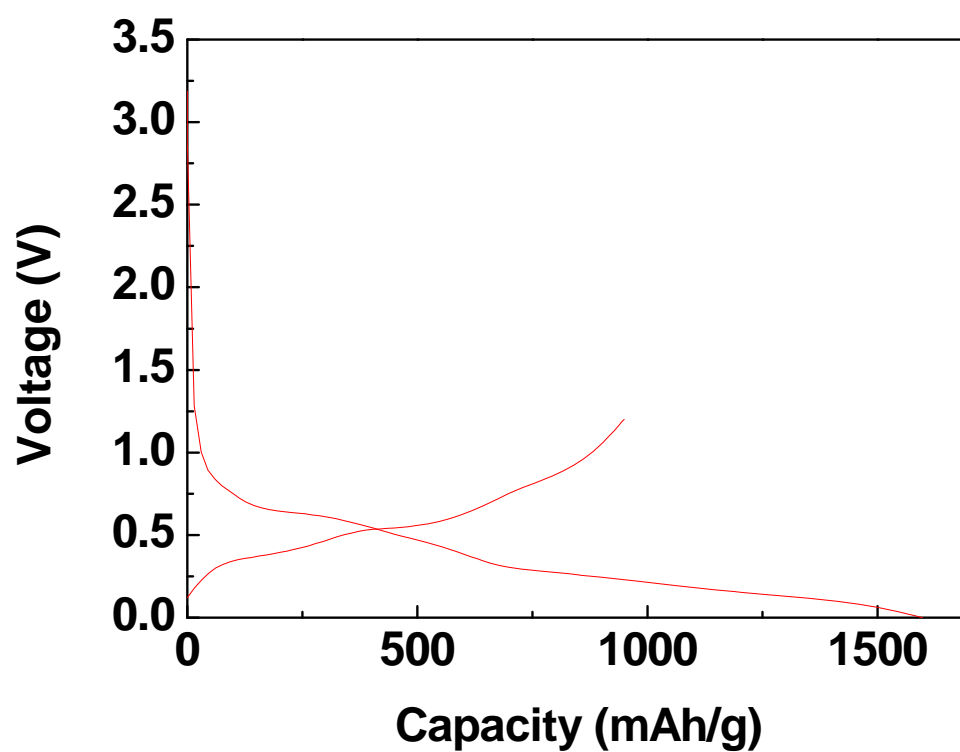

**S3.** Voltage profiles of uncoated Ge-NW during the first cycle in a coin-type half cell at 21°C. C rate was 0.5C.

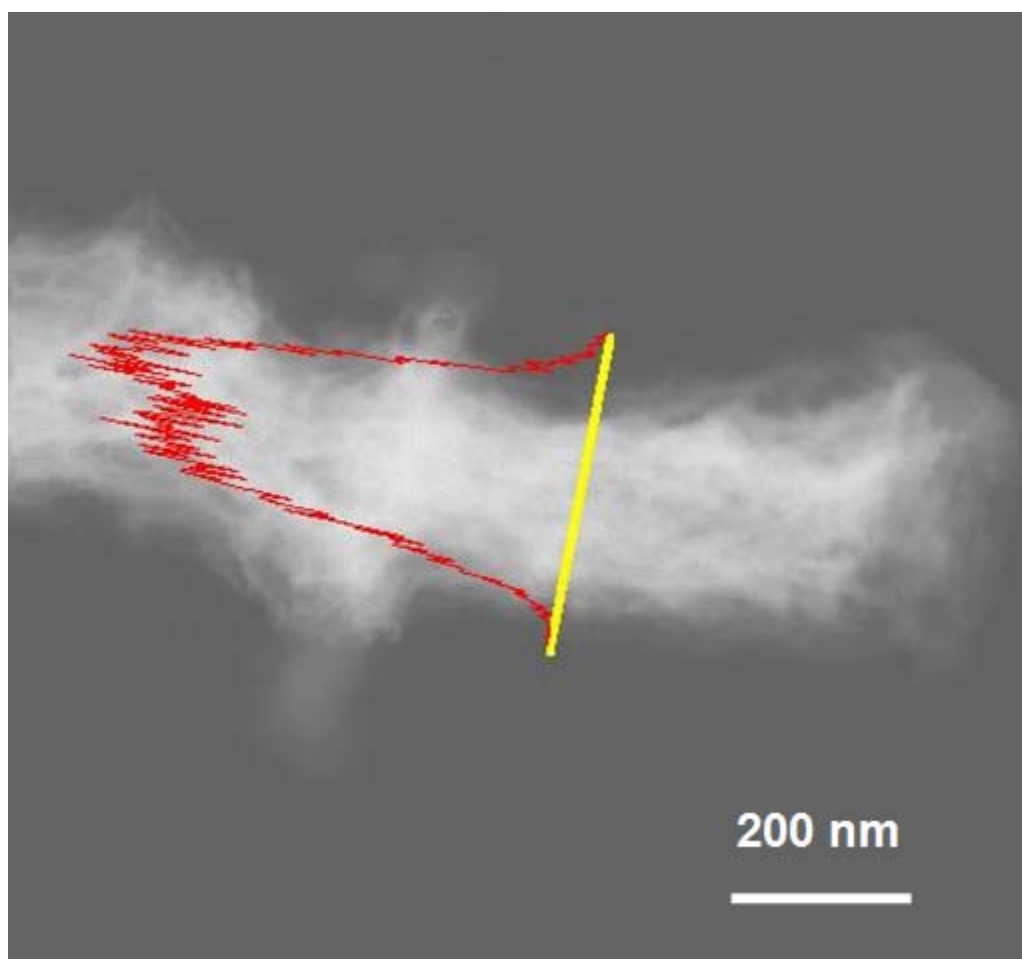

**S4.** TEM image of c-NW after 100 cycles and line mapping of Ge along the yellow line.
